# Supplementary material for: Integration site–dependent HIV-1 promoter activity shapes host chromatin conformation
Source: Genome Res. 2023 Jun;33(6):891–906. doi: 10.1101/gr.277698.123 (PMC10519397; doi:10.1101/gr.277698.123)
Supplement: Supplement 1 [file Supplemental_Table_S1.xlsx]

## Sheet: GeneActivityDE
Motif name	Jaspar Motif ID	P Value	Average Difference of activity	Percentage of cell type >0 activity	Percetage of all other cells >0 activity	Adjusted P value	Cell type identified in
CTCF	MA0139.1	5.33669e-14	0.250627	0.57	0.475	3.98117e-11	1D7
RFX2	MA0600.2	5.66743e-17	0.300751	0.597	0.493	4.2279e-14	1G2
RFX3	MA0798.2	5.6742e-18	0.292656	0.612	0.493	4.23295e-15	1G2
RFX5	MA0510.2	2.55201e-13	0.262189	0.59	0.485	1.9038e-10	1G2
LEF1	MA0768.1	4.89863e-16	0.261438	0.562	0.454	3.65438e-13	1G2
SOX10	MA0442.2	1.04506e-15	0.258888	0.485	0.391	7.79618e-13	1G2
MYB	MA0100.3	1.61383e-15	0.258655	0.54	0.445	1.20391e-12	1G2
RFX4	MA0799.1	6.13501e-13	0.256376	0.574	0.489	4.57672e-10	1G2
RFX1	MA0509.2	2.07196e-14	0.253292	0.578	0.489	1.54568e-11	1G2
FOS::JUNB	MA1134.1	6.03303e-79	0.568227	0.594	0.403	4.50064e-76	5F9
FOS::JUND	MA1141.1	3.16368e-76	0.547908	0.595	0.419	2.36011e-73	5F9
FOSB::JUNB	MA1135.1	8.63415e-70	0.536511	0.579	0.418	6.44108e-67	5F9
FOSL2::JUND	MA1144.1	1.69958e-70	0.536027	0.585	0.407	1.26789e-67	5F9
Smad2::Smad3	MA1622.1	1.471e-70	0.531807	0.592	0.42	1.09736e-67	5F9
FOSL1	MA0477.2	1.92513e-70	0.530846	0.588	0.417	1.43615e-67	5F9
FOSL2::JUNB	MA1138.1	1.92526e-68	0.528274	0.582	0.414	1.43624e-65	5F9
FOSL1::JUNB	MA1137.1	1.04238e-68	0.526284	0.578	0.411	7.77613e-66	5F9
JUN(var.2)	MA0489.1	2.90542e-69	0.523513	0.577	0.413	2.16745e-66	5F9
FOSL2::JUN	MA1130.1	1.3156e-67	0.523248	0.578	0.416	9.81439e-65	5F9
FOSL1::JUN	MA1128.1	1.87223e-67	0.514441	0.583	0.423	1.39669e-64	5F9
FOS::JUN	MA0099.3	1.86227e-64	0.511788	0.574	0.413	1.38925e-61	5F9
BATF	MA1634.1	2.48829e-64	0.505359	0.587	0.43	1.85626e-61	5F9
BATF::JUN	MA0462.2	2.01504e-64	0.505283	0.587	0.432	1.50322e-61	5F9
JUND	MA0491.2	1.6259e-60	0.501925	0.574	0.424	1.21292e-57	5F9
FOSL2	MA0478.1	6.77872e-63	0.500141	0.582	0.418	5.05692e-60	5F9
JUNB	MA0490.2	2.64029e-59	0.492786	0.573	0.423	1.96966e-56	5F9
FOSL1::JUND	MA1142.1	1.34407e-60	0.489365	0.569	0.422	1.00268e-57	5F9
BATF3	MA0835.2	1.11086e-58	0.47918	0.587	0.439	8.28703e-56	5F9
BACH2	MA1101.2	1.63882e-62	0.468798	0.586	0.427	1.22256e-59	5F9
JDP2	MA0655.1	3.70194e-58	0.46387	0.575	0.428	2.76165e-55	5F9
FOS	MA0476.1	1.2477e-53	0.453919	0.57	0.423	9.30781e-51	5F9
JUN::JUNB	MA1132.1	1.49052e-60	0.446677	0.586	0.417	1.11193e-57	5F9
GATA1::TAL1	MA0140.2	2.80792e-49	0.415815	0.567	0.424	2.09471e-46	5F9
NFE2	MA0841.1	1.67436e-47	0.399789	0.579	0.444	1.24907e-44	5F9
BACH1	MA1633.1	3.00746e-46	0.386431	0.558	0.427	2.24357e-43	5F9
SNAI1	MA1558.1	1.0384e-36	0.38044	0.59	0.479	7.74646e-34	5F9
CTCF	MA0139.1	9.65054e-29	0.371423	0.557	0.464	7.1993e-26	5F9
CEBPD	MA0836.2	4.11926e-44	0.370537	0.529	0.401	3.07297e-41	5F9
NFE2L1	MA0089.2	2.147e-40	0.369685	0.551	0.427	1.60166e-37	5F9
RUNX1	MA0002.2	9.3103e-37	0.365595	0.571	0.449	6.94548e-34	5F9
SNAI3	MA1559.1	7.32333e-32	0.345395	0.595	0.483	5.4632e-29	5F9
CEBPG	MA0838.1	4.64598e-37	0.332874	0.546	0.425	3.4659e-34	5F9
Ptf1a(var.3)	MA1620.1	5.15361e-28	0.330849	0.574	0.48	3.84459e-25	5F9
CEBPG(var.2)	MA1636.1	8.09513e-38	0.320591	0.557	0.428	6.03896e-35	5F9
Nfe2l2	MA0150.2	7.84252e-33	0.319183	0.545	0.439	5.85052e-30	5F9
CEBPA	MA0102.4	1.04142e-34	0.314407	0.537	0.421	7.76902e-32	5F9
ZBTB18	MA0698.1	2.2097e-27	0.311696	0.579	0.461	1.64843e-24	5F9
SNAI2	MA0745.2	1.05962e-27	0.303442	0.576	0.48	7.90478e-25	5F9
CEBPB	MA0466.2	1.54555e-31	0.302819	0.537	0.43	1.15298e-28	5F9
CEBPE	MA0837.1	2.46765e-31	0.299822	0.538	0.43	1.84087e-28	5F9
Rbpjl	MA1621.1	2.95926e-25	0.299123	0.575	0.474	2.20761e-22	5F9
TCF3	MA0522.3	7.47892e-28	0.296038	0.598	0.495	5.57928e-25	5F9
MAF::NFE2	MA0501.1	6.43534e-27	0.295687	0.549	0.438	4.80076e-24	5F9
TCF12(var.2)	MA1648.1	7.71621e-28	0.293395	0.593	0.493	5.75629e-25	5F9
Tcf12	MA0521.1	4.0257e-25	0.289823	0.543	0.442	3.00317e-22	5F9
RUNX3	MA0684.2	1.28435e-28	0.289552	0.525	0.43	9.58124e-26	5F9
Ptf1a	MA1618.1	3.28274e-24	0.286687	0.569	0.48	2.44893e-21	5F9
ASCL1(var.2)	MA1631.1	1.3114e-25	0.273251	0.586	0.482	9.78308e-23	5F9
NEUROD1	MA1109.1	1.08955e-26	0.268844	0.561	0.458	8.12805e-24	5F9
Bach1::Mafk	MA0591.1	7.73429e-27	0.266599	0.554	0.448	5.76978e-24	5F9
FIGLA	MA0820.1	5.42903e-21	0.266152	0.564	0.48	4.05006e-18	5F9
NEUROG2(var.2)	MA1642.1	1.45493e-26	0.265437	0.571	0.468	1.08538e-23	5F9
TCF4	MA0830.2	1.44836e-23	0.264932	0.575	0.481	1.08047e-20	5F9
GATA4	MA0482.2	8.47049e-20	0.261097	0.534	0.46	6.31898e-17	5F9
NFYA	MA0060.3	8.15304e-98	0.599819	0.681	0.461	6.08217e-95	8B10
NFYC	MA1644.1	1.01095e-92	0.584889	0.674	0.456	7.54165e-90	8B10
NFYB	MA0502.2	7.27766e-41	0.350408	0.604	0.465	5.42914e-38	8B10
ELF2	MA1483.1	1.26157e-29	0.320689	0.528	0.412	9.41131e-27	8B10
ELF4	MA0641.1	8.51471e-28	0.305503	0.547	0.422	6.35197e-25	8B10
Smad4	MA1153.1	1.22826e-23	0.276798	0.555	0.452	9.16279e-21	8B10
ELK1	MA0028.2	1.01399e-21	0.269524	0.519	0.412	7.56435e-19	8B10
SRF	MA0083.3	6.76184e-21	0.267897	0.534	0.425	5.04433e-18	8B10
LEF1	MA0768.1	3.02657e-20	0.264542	0.544	0.448	2.25782e-17	8B10
ELK3	MA0759.1	2.40981e-20	0.264209	0.52	0.413	1.79772e-17	8B10

## Sheet: README
FindAllMarkers output for each cluster based on DOGMA-seq Chromvar. Associated with Figure 1, 2, S1, and S5.
Column	Description
Motif name	Name associated with Matrix ID from JASPAR 2020
Jaspar Motif ID	Matrix ID from JASPAR 2020
P Value	Wilcox test-derived p value
Average Difference of activity	Average (mean) difference in transcription factor activity between cells in cell line and cells in all other cell lines
Percentage of cell type >0 activity	Prortion of cells in cell line with positive transcription factor motif activity
Percetage of all other cells >0 activity	Prortion of cells not in cell line with positive transcription factor motif activity
Adjusted P value	Bonferroni adjusted p value
Cell type identified in	The cell line clone in which the marker is significantly enriched
