# Supplementary material for: Integration site–dependent HIV-1 promoter activity shapes host chromatin conformation
Source: Genome Res. 2023 Jun;33(6):891–906. doi: 10.1101/gr.277698.123 (PMC10519397; doi:10.1101/gr.277698.123)
Supplement: Supplement 2 [file Supplemental_Table_S2.xlsx]

## Sheet: Sheet1
Library	Reads	Mapped	Mapped %	Valid fragments	Invalid fragments	Dangling_end_pairs	Religation_pairs	Self_Cycle_pairs	Trans	Cis (short)	Cis (long)	CIS:TRANS	Short:long	Valid:invalid
H3K27Ac-HICHIP_1G22	857789619	531061123	61.91	439088328	84392075	69517377	4517756	10356942	141086588	14111327	141893651	1.10574	0.09945	5.20296
H3K27Ac-HICHIP_5F9	288899135	170140838	58.893	146699832	20559126	16189976	2478989	1890161	39367624	13752300	76285251	2.2871	0.180275	7.13551
H3K27Ac-HICHIP_Jurkat	310497073	190943020	61.496	169409203	18866469	14689019	1222806	2954644	64706996	6917029	66405277	1.13314	0.104164	8.97938
H3K27Ac-HICHIP_1D7_Rep1	501323791	317649891	63.362	284224665	29307827	23563972	1971905	3771950	93076281	13289295	118925711	1.4205	0.111745	9.69791
H3K27Ac-HICHIP_1D7_Rep2	754888177	420774905	55.74	385099166	27182370	21458755	2531317	3192298	125605482	19419045	155323474	1.3912	0.125023	14.1672
Hi-C_Jurkat	327186547	210077175	64.207	182645865	25040509	20732237	1481005	2827267	76241948	7616807	73759336	1.06734	0.103266	7.29402
Hi-C_5F9	454156653	278326805	61.284	249197630	24293228	20121062	2968000	1204166	67871169	21013590	122145849	2.10928	0.172037	10.2579
Hi-C_1D7_Rep1	393327703	249593971	63.457	218589664	28065155	23919754	1846017	2299384	71414602	11412892	99725845	1.55625	0.114443	7.78865
Hi-C_1G2	323541786	199643282	61.706	176880280	20667913	17755557	1278736	1633620	74231834	6883380	72817019	1.07367	0.0945298	8.55821
Hi-C_1D7_Rep2	271975361	175626021	64.574	155867983	17907709	15609649	1078218	1219842	53721480	7659691	72017136	1.48315	0.106359	8.70396

## Sheet: README
Quality control metrics reported by HiC Pro for HiC and HiChIP libraries
Column	Description
Library	Name of the library in the format method_cell line
Reads	Number of read pairs from sequencing
Mapped	Number of read pairs mapped to genome
Mapped %	Percentage of read pairs mapped to genome of those sequenced
Valid fragments	Fragments not discarded due to detection of self-circle, religation, or dangling end
Invalid fragments	Fragments discarded due to detection of self-circle, religation, or dangling end
Dangling_end_pairs	Fragments in which the alignment suggests the chromatin was not digested.
Religation_pairs	Fragments in which the alignment suggests the digested chromatin has ligated back into its original linear orientation.
Self_Cycle_pairs	Fragments in which the alignment suggests the digested chromatin has ligated into a circle with itself.
Trans	Number of interactions detected between chromosomes
Cis (short)	Number of interactions detected on the cis chromosome less than 20kb
Cis (long)	Number of interactions detected on the cis chromosome greater than 20kb
CIS:TRANS	The ratio of cis chromosomal to trans chromosomal interactions.
Short:long	The ratio of short cis chromosomal interactions to long cis chromosomal interactions.
Valid:invalid	The ratio of valid pairs to invalid pairs.
