# Supplementary material for: Integration site–dependent HIV-1 promoter activity shapes host chromatin conformation
Source: Genome Res. 2023 Jun;33(6):891–906. doi: 10.1101/gr.277698.123 (PMC10519397; doi:10.1101/gr.277698.123)
Supplement: Supplement 3 [file Supplemental_Table_S3.xlsx]

## Sheet: README
HiCCompare results for pairwise comparisons at the three integration sites assayed.
Each tab represents one integration site and assay. In each case all samples were compared to all other samples in a pairwise manner.
Results are organized such that the interactions identified in cell lines with a provirus at that integration site are above those that do not.
Tab	Description
1G2Integration_hic	genomic region surrounding RAP1B Hi-C data
5F9Integration_hic	genomic region surrounding INPPL1 Hi-C data
1D7Integration_hic	genomic region surrounding SPECC1 Hi-C data
1G2Integration_hichip	genomic region surrounding RAP1B H3K27ac HiChIP data
5F9Integration_hichip	genomic region surrounding INPPL1 H3K27ac HiChIP data
1D7Integration_hichip	genomic region surrounding SPECC1 H3K27ac HiChIP data
Column	Description
Sample 1	First sample name
Sample 2	Second sample name
Chromosome	Chromosome of window
Genomic Start window 1	Base pair location start of section one
Genomic End window 1	Base pair location end of section one
Genomic Start window 2	Base pair location start of section two
Genomic End window 2	Base pair location end of section two
Distance between Windows (D)	Absolute base pair difference between windows
Normalized interaction frequency 1	loess normalized interaction frequency
Normalized interaction frequency 2	loess normalized interaction frequency
Normalized Log2 Difference in Interaction Frequency (M)	Log2 of difference in loess normalized interaction frequency between window 1 and window 2
Z-score calculated for itneraction	Z score of M
p value	Normal distribution Z score converted p value
adjusted p value	The FDR adjusted p value.
Contains the integration site in one window	Boolean, TRUE if HIV-1 integration site falls in that window

## Sheet: 1G2integration_hic
Sample 1	Sample 2	Chromosome	Genomic Start window 1	Genomic End window 1	Genomic Start window 2	Genomic End window 2	Distance between Windows (D)	Normalized interaction frequency 1	Normalized interaction frequency 2	Normalized Log2 Difference in Interaction Frequency (M)	Z-score calculated for itneraction	p value	adjusted p value	Contains the integration site in one window
Comparisons between two lines wherein one contains a provirus within the region tested
Jurkat	1G2	chr12	68950000	68975000	69100000	69125000	150000	11.8929	28.623	1.26707	2.93474	0.00333832	0.0300449	FALSE
1G2	5F9	chr12	68850000	68875000	69075000	69100000	225000	16.1408	35.8854	1.15268	2.56728	0.0102499	0.0204998	FALSE
1G2	1D7R1	chr12	68625000	68650000	68750000	68775000	125000	23.505	10.3985	-1.1766	-3.12838	0.00175772	0.0228503	FALSE
1G2	1D7R1	chr12	68850000	68875000	69075000	69100000	225000	18.4659	41.9141	1.18257	3.15043	0.00163033	0.00489098	FALSE
1G2	1D7R2	chr12	68650000	68675000	68750000	68775000	100000	13.2745	27.1056	1.02993	2.76295	0.0057282	0.0458256	FALSE
1G2	1D7R2	chr12	68975000	69000000	69075000	69100000	100000	24.5068	8.21383	-1.57706	-4.08942	4.32458e-05	0.000691933	FALSE
Comparisons between two lines not containing a provirus within the region tested
Jurkat	1D7R1	chr12	68525000	68550000	68625000	68650000	100000	12.0712	31.9978	1.40641	3.53161	0.000413044	0.00784783	FALSE
Jurkat	1D7R2	chr12	68525000	68550000	68625000	68650000	100000	12.2132	27.1345	1.15169	2.89717	0.0037654	0.0357713	FALSE
Jurkat	1D7R2	chr12	68975000	69000000	69075000	69100000	100000	22.3909	9.35673	-1.25883	-3.13944	0.00169269	0.0321612	FALSE
5F9	1D7R1	chr12	68825000	68850000	68950000	68975000	125000	36.3709	15.3989	-1.23995	-3.05324	0.00226383	0.0430128	FALSE
5F9	1D7R1	chr12	68800000	68825000	69050000	69075000	250000	29.6748	11.1022	-1.4184	-3.49819	0.000468433	0.0042159	FALSE
5F9	1D7R1	chr12	68825000	68850000	69075000	69100000	250000	56.9756	27.7554	-1.03758	-2.54863	0.0108147	0.0486662	FALSE
5F9	1D7R1	chr12	68525000	68550000	68800000	68825000	275000	24.3777	10.8117	-1.17297	-2.88623	0.00389888	0.0155955	FALSE
5F9	1D7R2	chr12	68975000	69000000	69075000	69100000	100000	57.5525	21.952	-1.39052	-3.34088	0.000835134	0.0167027	FALSE
5F9	1D7R2	chr12	68650000	68675000	68825000	68850000	175000	33.4874	14.1827	-1.23948	-2.97841	0.00289745	0.0492566	FALSE
5F9	1D7R2	chr12	68800000	68825000	69100000	69125000	300000	26.9091	12.781	-1.0741	-2.58154	0.00983594	0.0393438	FALSE
1D7R1	1D7R2	chr12	68825000	68850000	68950000	68975000	125000	10.1672	26.5507	1.38483	3.47552	0.000509868	0.00917762	FALSE
1D7R1	1D7R2	chr12	68600000	68625000	68825000	68850000	225000	10.163	23.7656	1.22554	3.06988	0.00214143	0.0171314	TRUE
1D7R1	1D7R2	chr12	68750000	68775000	69075000	69100000	325000	10.7418	20.3688	0.923118	2.29975	0.0214622	0.0429243	FALSE

## Sheet: 5F9integration_hic
Sample 1	Sample 2	Chromosome	Genomic Start window 1	Genomic End window 1	Genomic Start window 2	Genomic End window 2	Distance between Windows (D)	Normalized interaction frequency 1	Normalized interaction frequency 2	Normalized Log2 Difference in Interaction Frequency (M)	Z-score calculated for itneraction	p value	adjusted p value	Contains the integration site in one window
Comparisons between two lines wherein one contains a provirus within the region tested
1G2	5F9	chr11	72025000	72050000	72200000	72225000	175000	8.74371	22.9005	1.38906	3.4756	0.000509703	0.00815524	FALSE
1G2	5F9	chr11	71925000	71950000	72225000	72250000	300000	10.9059	20.7851	0.930441	2.34621	0.0189656	0.0379313	TRUE
1G2	5F9	chr11	72125000	72150000	72425000	72450000	300000	10.9059	19.8614	0.864853	2.18469	0.0289118	0.0433677	FALSE
1G2	5F9	chr11	72150000	72175000	72450000	72475000	300000	29.9913	10.1616	-1.56141	-3.79026	0.000150489	0.000902933	FALSE
1G2	5F9	chr11	72275000	72300000	72575000	72600000	300000	9.99709	21.247	1.08768	2.73343	0.00626792	0.0188038	FALSE
1G2	5F9	chr11	72275000	72300000	72625000	72650000	350000	28.5537	13.1725	-1.11615	-2.69376	0.007065	0.02826	FALSE
1G2	5F9	chr11	72025000	72050000	72400000	72425000	375000	11.522	20.366	0.82177	2.07859	0.0376551	0.0376551	FALSE
5F9	1D7R1	chr11	72050000	72075000	72400000	72425000	350000	32.8299	12.1166	-1.43802	-3.51494	0.000439846	0.0101164	FALSE
5F9	1D7R1	chr11	71775000	71800000	72150000	72175000	375000	27.5478	13.2366	-1.05741	-2.59574	0.00943864	0.0495529	FALSE
5F9	1D7R1	chr11	71900000	71925000	72275000	72300000	375000	33.0574	14.4399	-1.19491	-2.92782	0.00341343	0.0393089	FALSE
5F9	1D7R1	chr11	72000000	72025000	72375000	72400000	375000	18.7325	43.3196	1.20948	2.87894	0.00399013	0.0393089	FALSE
5F9	1D7R1	chr11	72025000	72050000	72400000	72425000	375000	47.3823	21.6598	-1.12933	-2.76942	0.00561555	0.0393089	FALSE
5F9	1D7R1	chr11	72075000	72100000	72575000	72600000	500000	10.1095	25.9696	1.36111	3.24514	0.00117393	0.0129132	FALSE
5F9	1D7R1	chr11	72000000	72025000	72625000	72650000	625000	10.2271	23.3372	1.19023	2.83247	0.00461897	0.0184759	FALSE
5F9	1D7R1	chr11	71775000	71800000	72550000	72575000	775000	10.4149	20.6249	0.985741	2.33861	0.0193557	0.0193557	FALSE
5F9	1D7R2	chr11	71775000	71800000	71950000	71975000	175000	34.6059	9.14581	-1.91983	-4.23292	2.30676e-05	0.000761229	FALSE
5F9	1D7R2	chr11	71875000	71900000	72100000	72125000	225000	13.9344	39.3699	1.49844	3.20724	0.00134017	0.0375248	FALSE
5F9	1D7R2	chr11	72275000	72300000	72725000	72750000	450000	6.81706	27.0124	1.9864	4.26932	1.96072e-05	0.0002745	FALSE
5F9	1D7R2	chr11	72175000	72200000	72700000	72725000	525000	10.3706	26.6346	1.3608	2.90765	0.00364154	0.0400569	FALSE
Comparisons between two lines not containing a provirus within the region tested
Jurkat	1G2	chr11	72275000	72300000	72575000	72600000	300000	39.4944	13.2648	-1.57405	-3.64746	0.000264844	0.00238359	FALSE
Jurkat	1G2	chr11	72375000	72400000	72675000	72700000	300000	23.2915	7.23533	-1.68667	-3.9041	9.45755e-05	0.00170236	FALSE
Jurkat	1G2	chr11	71950000	71975000	72300000	72325000	350000	12.1405	31.383	1.37015	3.06131	0.0022037	0.0198333	FALSE
Jurkat	1G2	chr11	71975000	72000000	72450000	72475000	475000	8.04805	23.0638	1.51892	3.4003	0.000673109	0.00134622	FALSE
Jurkat	1G2	chr11	72125000	72150000	72650000	72675000	525000	12.0561	23.0943	0.937771	2.07608	0.037887	0.037887	FALSE
Jurkat	1D7R1	chr11	71950000	71975000	72025000	72050000	75000	14.1989	37.5377	1.40257	3.80729	0.000140498	0.00519842	FALSE
Jurkat	1D7R1	chr11	71775000	71800000	72075000	72100000	300000	22.8803	7.51735	-1.60581	-4.34376	1.40063e-05	0.000196088	FALSE
Jurkat	1D7R1	chr11	72375000	72400000	72675000	72700000	300000	22.8803	8.20075	-1.48028	-4.00364	6.23747e-05	0.000436623	FALSE
Jurkat	1D7R1	chr11	71925000	71950000	72300000	72325000	375000	10.8415	22.7627	1.07011	2.90653	0.00365462	0.0255823	FALSE
Jurkat	1D7R2	chr11	71775000	71800000	72075000	72100000	300000	23.1966	9.75141	-1.25023	-3.18795	0.00143284	0.0229254	FALSE
Jurkat	1D7R2	chr11	71825000	71850000	72225000	72250000	400000	21.9942	9.83735	-1.16078	-2.96418	0.00303493	0.0303493	TRUE
Jurkat	1D7R2	chr11	71950000	71975000	72450000	72475000	500000	9.84019	21.9879	1.15995	2.84182	0.00448575	0.00897149	FALSE
1G2	1D7R1	chr11	72425000	72450000	72525000	72550000	100000	23.4011	10.3969	-1.17041	-3.28497	0.00101992	0.0305975	FALSE
1G2	1D7R1	chr11	72025000	72050000	72200000	72225000	175000	9.10747	21.457	1.23633	3.47715	0.000506768	0.00861506	FALSE
1G2	1D7R1	chr11	72150000	72175000	72450000	72475000	300000	32.3528	17.6045	-0.877946	-2.46324	0.0137689	0.0481912	FALSE
1G2	1D7R1	chr11	72275000	72300000	72575000	72600000	300000	10.7843	21.5797	1.00075	2.81526	0.00487379	0.0341166	FALSE
1G2	1D7R1	chr11	72275000	72300000	72625000	72650000	350000	31.2511	13.1121	-1.25301	-3.51703	0.000436405	0.00261843	FALSE
1G2	1D7R2	chr11	72025000	72050000	72200000	72225000	175000	9.16954	21.3403	1.21866	3.17415	0.00150276	0.0165303	FALSE
1G2	1D7R2	chr11	72250000	72275000	72425000	72450000	175000	14.2637	31.6152	1.14827	2.99128	0.00277814	0.020373	FALSE
1G2	1D7R2	chr11	72525000	72550000	72700000	72725000	175000	9.16954	22.1307	1.27113	3.31046	0.000931416	0.0165303	FALSE
1G2	1D7R2	chr11	72225000	72250000	72500000	72525000	275000	10.0434	23.252	1.21112	3.15456	0.00160742	0.0160742	TRUE
1G2	1D7R2	chr11	71925000	71950000	72225000	72250000	300000	12.0205	24.9209	1.05186	2.7408	0.00612893	0.0490314	TRUE
1G2	1D7R2	chr11	72325000	72350000	72650000	72675000	325000	10.0077	20.9209	1.06383	2.77189	0.00557317	0.0278658	FALSE
1D7R1	1D7R2	chr11	71850000	71875000	72025000	72050000	175000	9.04289	24.4761	1.43652	3.42514	0.000614487	0.0196636	FALSE
1D7R1	1D7R2	chr11	72500000	72525000	72725000	72750000	225000	29.2557	10.0379	-1.54325	-3.72799	0.000193014	0.00521137	FALSE
1D7R1	1D7R2	chr11	72200000	72225000	72600000	72625000	400000	11.2067	28.399	1.34148	3.19699	0.00138869	0.0249963	FALSE
1D7R1	1D7R2	chr11	72175000	72200000	72600000	72625000	425000	25.5086	9.92454	-1.36191	-3.29266	0.000992441	0.0119093	FALSE
1D7R1	1D7R2	chr11	72075000	72100000	72575000	72600000	500000	22.5335	8.4743	-1.41091	-3.41028	0.000648962	0.00584066	FALSE
1D7R1	1D7R2	chr11	72175000	72200000	72700000	72725000	525000	9.22758	22.5753	1.29072	3.07513	0.00210409	0.0105205	FALSE
1D7R1	1D7R2	chr11	71850000	71875000	72425000	72450000	575000	10.2739	21.1211	1.03971	2.47256	0.0134148	0.0268297	FALSE
1D7R1	1D7R2	chr11	71950000	71975000	72525000	72550000	575000	20.5477	9.85651	-1.05983	-2.5675	0.0102434	0.0268297	FALSE
1D7R1	1D7R2	chr11	71975000	72000000	72625000	72650000	650000	6.18309	23.8646	1.94847	4.65411	3.25388e-06	3.25388e-06	FALSE

## Sheet: 1D7integration_hic
Sample 1	Sample 2	Chromosome	Genomic Start window 1	Genomic End window 1	Genomic Start window 2	Genomic End window 2	Distance between Windows (D)	Normalized interaction frequency 1	Normalized interaction frequency 2	Normalized Log2 Difference in Interaction Frequency (M)	Z-score calculated for itneraction	p value	adjusted p value	Contains the integration site in one window
Comparisons between two lines wherein one contains a provirus within the region tested
Jurkat	1D7R1	chr17	20150000	20175000	20300000	20325000	150000	10.0945	24.3198	1.26856	3.51666	0.000437012	0.00524415	FALSE
Jurkat	1D7R2	chr17	19950000	19975000	20000000	20025000	50000	35.2606	14.6515	-1.26701	-3.17563	0.00149512	0.0403682	FALSE
Jurkat	1D7R2	chr17	19875000	19900000	20050000	20075000	175000	25.7464	11.4661	-1.167	-2.9172	0.00353192	0.0353192	FALSE
Jurkat	1D7R2	chr17	19825000	19850000	20075000	20100000	250000	10.963	20.7346	0.919401	2.47402	0.0133602	0.0267204	FALSE
1G2	1D7R1	chr17	20100000	20125000	20225000	20250000	125000	12.2126	25.625	1.06918	2.83792	0.0045408	0.0295152	FALSE
1G2	1D7R1	chr17	20150000	20175000	20275000	20300000	125000	26.4607	9.53488	-1.47256	-3.59291	0.000327	0.004251	FALSE
1G2	1D7R1	chr17	19975000	20000000	20200000	20225000	225000	11.9676	23.7171	0.986793	2.62948	0.00855156	0.00855156	FALSE
1G2	1D7R2	chr17	19850000	19875000	20000000	20025000	150000	11.1748	22.6226	1.01752	2.93862	0.00329677	0.029671	FALSE
1G2	1D7R2	chr17	20150000	20175000	20300000	20325000	150000	27.429	13.406	-1.03283	-2.63606	0.00838742	0.0377434	FALSE
1G2	1D7R2	chr17	19975000	20000000	20200000	20225000	225000	11.9681	26.4572	1.14447	3.28379	0.00102422	0.00204845	FALSE
5F9	1D7R1	chr17	19950000	19975000	20150000	20175000	200000	33.1974	10.352	-1.68116	-3.4955	0.000473171	0.00946341	FALSE
5F9	1D7R1	chr17	19775000	19800000	20075000	20100000	300000	10.8595	30.6253	1.49577	3.21374	0.00131018	0.00786107	FALSE
5F9	1D7R1	chr17	19850000	19875000	20150000	20175000	300000	9.77352	27.7086	1.50338	3.22982	0.00123869	0.00786107	FALSE
5F9	1D7R1	chr17	20100000	20125000	20700000	20725000	600000	20.2975	9.83098	-1.0459	-2.15391	0.031247	0.031247	FALSE
5F9	1D7R2	chr17	19800000	19825000	20025000	20050000	225000	14.2633	42.495	1.57499	3.06959	0.00214354	0.0385837	FALSE
5F9	1D7R2	chr17	20375000	20400000	20700000	20725000	325000	7.48111	22.8518	1.61098	3.14051	0.00168652	0.0151787	FALSE
5F9	1D7R2	chr17	20175000	20200000	20675000	20700000	500000	11.2083	25.7512	1.20007	2.33083	0.0197624	0.0296436	FALSE
5F9	1D7R2	chr17	20200000	20225000	20700000	20725000	500000	25.7791	7.92345	-1.702	-3.38758	0.000705109	0.00211533	FALSE
5F9	1D7R2	chr17	20075000	20100000	20750000	20775000	675000	8.34027	26.088	1.64522	3.20798	0.00133671	0.00133671	FALSE
1D7R1	1D7R2	chr17	20100000	20125000	20225000	20250000	125000	43.6458	16.5716	-1.39713	-3.35015	0.000807664	0.0193839	FALSE
1D7R1	1D7R2	chr17	19875000	19900000	20075000	20100000	200000	24.2878	8.31058	-1.54721	-3.70564	0.000210859	0.00274117	FALSE
1D7R1	1D7R2	chr17	19925000	19950000	20175000	20200000	250000	6.97063	23.9294	1.77942	4.17396	2.9935e-05	0.000269415	FALSE
Comparisons between two lines not containing a provirus within the region tested
Jurkat	1G2	chr17	19950000	19975000	20000000	20025000	50000	34.4516	12.9117	-1.41589	-3.29897	0.000970413	0.0271716	FALSE
Jurkat	1G2	chr17	20100000	20125000	20250000	20275000	150000	20.9649	9.2587	-1.17909	-2.74472	0.00605623	0.0333092	TRUE
Jurkat	1G2	chr17	20150000	20175000	20300000	20325000	150000	9.98327	31.2481	1.64618	3.86815	0.000109663	0.0012063	FALSE
Jurkat	1G2	chr17	19875000	19900000	20050000	20075000	175000	25.0444	10.3802	-1.27066	-2.95904	0.00308599	0.0308599	FALSE
Jurkat	1G2	chr17	19975000	20000000	20200000	20225000	225000	30.272	13.7402	-1.13958	-2.65223	0.00799615	0.0159923	FALSE
Jurkat	5F9	chr17	20625000	20650000	20675000	20700000	50000	28.8264	12.0447	-1.25899	-3.25003	0.00115392	0.0311559	FALSE
1G2	5F9	chr17	20625000	20650000	20675000	20700000	50000	24.2533	10.156	-1.25585	-3.14182	0.00167899	0.0402958	FALSE
1G2	5F9	chr17	20100000	20125000	20175000	20200000	75000	41.1521	17.845	-1.20544	-3.01639	0.00255807	0.0486033	FALSE
1G2	5F9	chr17	20100000	20125000	20275000	20300000	175000	21.583	10.5974	-1.02619	-2.57032	0.0101605	0.0406418	FALSE
1G2	5F9	chr17	19975000	20000000	20200000	20225000	225000	11.0397	26.6079	1.26915	3.14159	0.00168035	0.00168035	FALSE

## Sheet: 1G2integration_hichip
Sample 1	Sample 2	Chromosome	Genomic Start window 1	Genomic End window 1	Genomic Start window 2	Genomic End window 2	Distance between Windows (D)	Normalized interaction frequency 1	Normalized interaction frequency 2	Normalized Log2 Difference in Interaction Frequency (M)	Z-score calculated for itneraction	p value	adjusted p value	Contains the integration site in one window
Comparisons between two lines wherein one contains a provirus within the region tested
Jurkat	1G2	chr12	68825000	68850000	68900000	68925000	75000	23.8658	9.35414	-1.35127	-3.76459	0.000166819	0.00350321	FALSE
Jurkat	1G2	chr12	68550000	68575000	68700000	68725000	150000	26.8535	11.5532	-1.21682	-3.37369	0.000741678	0.00815846	FALSE
Jurkat	1G2	chr12	68625000	68650000	68775000	68800000	150000	11.9349	20.3556	0.770243	2.40363	0.0162332	0.0446413	FALSE
Jurkat	1G2	chr12	68900000	68925000	69050000	69075000	150000	36.7992	19.2553	-0.934419	-2.55262	0.0106916	0.0446413	FALSE
Jurkat	1G2	chr12	68925000	68950000	69075000	69100000	150000	27.8481	14.8541	-0.906716	-2.47208	0.0134331	0.0446413	FALSE
1G2	5F9	chr12	68800000	68825000	69050000	69075000	250000	11.4855	25.6906	1.16143	2.87818	0.00399977	0.0279984	FALSE
1G2	1D7R1	chr12	68750000	68775000	69050000	69075000	300000	21.1687	9.03783	-1.22789	-3.19201	0.00141285	0.0028257	FALSE
Comparisons between two lines not containing a provirus within the region tested
Jurkat	5F9	chr12	68575000	68600000	68775000	68800000	200000	10.0053	20.6682	1.04665	2.8028	0.00506618	0.0303971	FALSE
Jurkat	5F9	chr12	68875000	68900000	69075000	69100000	200000	15.4628	29.3355	0.92385	2.47558	0.0133022	0.0399065	FALSE
Jurkat	1D7R1	chr12	68850000	68875000	69075000	69100000	225000	43.5725	18.347	-1.24788	-3.38511	0.00071149	0.00284596	FALSE
Jurkat	1D7R1	chr12	68825000	68850000	69075000	69100000	250000	21.8082	10.0807	-1.11328	-3.01613	0.00256024	0.00768073	FALSE
Jurkat	1D7R2	chr12	68525000	68550000	68725000	68750000	200000	7.60672	24.2933	1.67521	3.02396	0.0024949	0.0174643	FALSE
Jurkat	1D7R2	chr12	68575000	68600000	68775000	68800000	200000	10.4592	27.8094	1.4108	2.54221	0.0110153	0.0257024	FALSE
Jurkat	1D7R2	chr12	68900000	68925000	69100000	69125000	200000	26.6235	10.2288	-1.38007	-2.54256	0.0110045	0.0257024	FALSE
5F9	1D7R1	chr12	68825000	68850000	69000000	69025000	175000	10.2029	23.4949	1.20337	3.60268	0.000314952	0.00377943	FALSE
5F9	1D7R1	chr12	68850000	68875000	69075000	69100000	225000	57.5985	26.6577	-1.11148	-3.34493	0.000823025	0.00576118	FALSE
5F9	1D7R1	chr12	68800000	68825000	69050000	69075000	250000	22.6846	10.4983	-1.11156	-3.34517	0.000822333	0.00411166	FALSE
5F9	1D7R2	chr12	68800000	68825000	69050000	69075000	250000	21.5072	9.73212	-1.144	-2.61186	0.009005	0.0414274	FALSE
5F9	1D7R2	chr12	68850000	68875000	69100000	69125000	250000	37.3546	17.6948	-1.07797	-2.46219	0.0138091	0.0414274	FALSE
1D7R1	1D7R2	chr12	68750000	68775000	68925000	68950000	175000	21.8857	8.73343	-1.32537	-3.36186	0.000774198	0.0123872	FALSE
1D7R1	1D7R2	chr12	68575000	68600000	68825000	68850000	250000	16.1331	43.1107	1.41802	3.5789	0.000345042	0.00241529	FALSE

## Sheet: 5F9integration_hichip
Sample 1	Sample 2	Chromosome	Genomic Start window 1	Genomic End window 1	Genomic Start window 2	Genomic End window 2	Distance between Windows (D)	Normalized interaction frequency 1	Normalized interaction frequency 2	Normalized Log2 Difference in Interaction Frequency (M)	Z-score calculated for itneraction	p value	adjusted p value	Contains the integration site in one window
Comparisons between two lines wherein one contains a provirus within the region tested
Jurkat	5F9	chr11	72025000	72050000	72400000	72425000	375000	16.0688	34.4252	1.0992	2.74838	0.00598903	0.00898354	FALSE
Jurkat	5F9	chr11	72225000	72250000	72600000	72625000	375000	26.7814	10.5383	-1.34558	-3.30432	0.000952077	0.00285623	TRUE
1G2	5F9	chr11	72150000	72175000	72625000	72650000	475000	23.2786	6.82411	-1.77029	-4.0264	5.66382e-05	0.000933139	FALSE
1G2	5F9	chr11	72175000	72200000	72650000	72675000	475000	33.2552	10.2362	-1.6999	-3.86789	0.000109781	0.000933139	FALSE
1G2	5F9	chr11	71975000	72000000	72600000	72625000	625000	27.4296	13.0307	-1.07382	-2.45805	0.0139693	0.041908	FALSE
1G2	5F9	chr11	72000000	72025000	72625000	72650000	625000	25.9057	9.30762	-1.47679	-3.36546	0.000764149	0.0045849	FALSE
1G2	5F9	chr11	71775000	71800000	72425000	72450000	650000	13.508	34.0204	1.33259	2.9608	0.0030684	0.0122736	FALSE
5F9	1D7R1	chr11	72250000	72275000	72450000	72475000	200000	17.2987	38.4472	1.15221	3.20675	0.00134244	0.0349033	FALSE
5F9	1D7R1	chr11	72025000	72050000	72400000	72425000	375000	55.0418	26.9129	-1.03223	-2.84633	0.0044226	0.0398034	FALSE
5F9	1D7R1	chr11	72150000	72175000	72525000	72550000	375000	21.3427	10.0923	-1.08048	-2.98005	0.00288204	0.0398034	FALSE
5F9	1D7R1	chr11	71775000	71800000	72225000	72250000	450000	24.8542	11.3728	-1.1279	-3.11143	0.00186185	0.0186185	TRUE
5F9	1D7R1	chr11	71875000	71900000	72400000	72425000	525000	23.1626	9.78882	-1.24259	-3.42925	0.000605254	0.00242102	FALSE
5F9	1D7R2	chr11	72400000	72425000	72475000	72500000	75000	17.4621	41.2062	1.23863	3.45678	0.000546666	0.0202267	FALSE
5F9	1D7R2	chr11	71875000	71900000	72075000	72100000	200000	8.565	23.0905	1.43078	4.00113	6.30407e-05	0.00176514	FALSE
5F9	1D7R2	chr11	71775000	71800000	72425000	72450000	650000	21.1545	12.5314	-0.755417	-2.19242	0.0283495	0.0283495	FALSE
Comparisons between two lines not containing a provirus within the region tested
Jurkat	1G2	chr11	72025000	72050000	72325000	72350000	300000	21.2667	10.0429	-1.08242	-3.16291	0.00156199	0.0203059	FALSE
Jurkat	1G2	chr11	72225000	72250000	72550000	72575000	325000	11.1725	23.0744	1.04634	3.14673	0.0016511	0.016511	TRUE
Jurkat	1D7R1	chr11	72050000	72075000	72225000	72250000	175000	10.1358	23.3847	1.20611	3.44547	0.000570069	0.0131116	TRUE
Jurkat	1D7R1	chr11	71775000	71800000	72000000	72025000	225000	24.4038	8.85782	-1.46208	-4.13721	3.5156e-05	0.000703119	FALSE
Jurkat	1D7R1	chr11	72225000	72250000	72550000	72575000	325000	11.0742	23.0727	1.05899	3.02738	0.00246687	0.0246687	TRUE
Jurkat	1D7R1	chr11	72000000	72025000	72375000	72400000	375000	20.0059	10.4259	-0.940256	-2.65423	0.00794887	0.027821	FALSE
Jurkat	1D7R1	chr11	72225000	72250000	72600000	72625000	375000	30.0089	13.7432	-1.12667	-3.184	0.00145256	0.0101679	TRUE
Jurkat	1D7R2	chr11	71925000	71950000	72050000	72075000	125000	7.01633	23.0488	1.7159	4.13902	3.48786e-05	0.00104636	FALSE
1G2	1D7R1	chr11	72025000	72050000	72350000	72375000	325000	16.8593	47.5633	1.49631	3.98458	6.75996e-05	0.00175759	FALSE
1G2	1D7R1	chr11	72075000	72100000	72475000	72500000	400000	10.6832	27.5957	1.3691	3.64218	0.000270342	0.00621787	FALSE
1G2	1D7R1	chr11	72100000	72125000	72500000	72525000	400000	25.2512	12.1421	-1.05633	-2.88638	0.00389703	0.0448158	FALSE
1G2	1D7R1	chr11	71900000	71925000	72525000	72550000	625000	8.39382	24.1385	1.52394	4.05896	4.92925e-05	0.000443632	FALSE
1G2	1D7R1	chr11	71775000	71800000	72425000	72450000	650000	16.7139	34.6357	1.05121	2.7865	0.00532806	0.0372964	FALSE
1G2	1D7R1	chr11	71950000	71975000	72650000	72675000	700000	27.628	9.31259	-1.56888	-4.266	1.99007e-05	9.95035e-05	FALSE
1G2	1D7R2	chr11	71750000	71775000	72225000	72250000	475000	24.2312	9.61015	-1.33423	-3.35786	0.000785497	0.0141389	TRUE
1G2	1D7R2	chr11	71850000	71875000	72325000	72350000	475000	22.3673	10.411	-1.10328	-2.78359	0.00537608	0.0483847	FALSE
1G2	1D7R2	chr11	71975000	72000000	72600000	72625000	625000	32.3522	13.2883	-1.28371	-3.23223	0.00122828	0.0122828	FALSE
1G2	1D7R2	chr11	71925000	71950000	72600000	72625000	675000	13.997	29.8609	1.09313	2.67776	0.00741173	0.034952	FALSE
1G2	1D7R2	chr11	72025000	72050000	72700000	72725000	675000	11.3726	23.8887	1.07077	2.62214	0.008738	0.034952	FALSE
1G2	1D7R2	chr11	71925000	71950000	72675000	72700000	750000	10.8834	22.2879	1.03413	2.53104	0.0113725	0.022745	FALSE
1D7R1	1D7R2	chr11	72050000	72075000	72450000	72475000	400000	9.74815	21.426	1.13616	3.01521	0.00256801	0.0256801	FALSE
1D7R1	1D7R2	chr11	72075000	72100000	72475000	72500000	400000	24.3704	12.1414	-1.00519	-2.72268	0.0064755	0.04317	FALSE
1D7R1	1D7R2	chr11	72100000	72125000	72500000	72525000	400000	10.723	27.8538	1.37717	3.66101	0.000251227	0.00502453	FALSE
1D7R1	1D7R2	chr11	71875000	71900000	72450000	72475000	575000	22.4586	10.6949	-1.07034	-2.89723	0.00376471	0.0301176	FALSE
1D7R1	1D7R2	chr11	71925000	71950000	72600000	72625000	675000	8.47038	25.891	1.61195	4.29012	1.78577e-05	0.000125004	FALSE

## Sheet: 1D7integration_hichip
Sample 1	Sample 2	Chromosome	Genomic Start window 1	Genomic End window 1	Genomic Start window 2	Genomic End window 2	Distance between Windows (D)	Normalized interaction frequency 1	Normalized interaction frequency 2	Normalized Log2 Difference in Interaction Frequency (M)	Z-score calculated for itneraction	p value	adjusted p value	Contains the integration site in one window
Comparisons between two lines wherein one contains a provirus within the region tested
Jurkat	1D7R1	chr17	20575000	20600000	20700000	20725000	125000	22.5218	10.1161	-1.15466	-2.98961	0.00279333	0.0418999	FALSE
Jurkat	1D7R1	chr17	19775000	19800000	19975000	20000000	200000	10.1556	19.858	0.967443	3.05889	0.00222155	0.0111078	FALSE
1G2	1D7R1	chr17	20000000	20025000	20200000	20225000	200000	36.7143	14.475	-1.34278	-2.99309	0.00276164	0.0497096	FALSE
1G2	1D7R1	chr17	19800000	19825000	20100000	20125000	300000	13.4466	32.2093	1.26023	2.73023	0.00632893	0.0316447	FALSE
1G2	1D7R1	chr17	19875000	19900000	20175000	20200000	300000	22.0909	9.20265	-1.26333	-2.81841	0.00482626	0.0316447	FALSE
1G2	1D7R1	chr17	19825000	19850000	20200000	20225000	375000	21.7971	9.32669	-1.2247	-2.73347	0.00626715	0.0313357	FALSE
1G2	1D7R2	chr17	20425000	20450000	20425000	20450000	0	41.8365	17.1138	-1.2896	-3.11344	0.00184918	0.0363635	FALSE
1G2	1D7R2	chr17	20450000	20475000	20450000	20475000	0	24.9027	10.2683	-1.2781	-3.08725	0.00202019	0.0363635	FALSE
1G2	1D7R2	chr17	20525000	20550000	20550000	20575000	25000	42.7119	15.446	-1.46741	-3.51863	0.000433776	0.0160497	FALSE
1G2	1D7R2	chr17	20500000	20525000	20550000	20575000	50000	29.7091	11.1892	-1.40879	-3.38507	0.000711597	0.0220595	FALSE
1G2	1D7R2	chr17	20025000	20050000	20200000	20225000	175000	10.7074	32.399	1.59734	3.46536	0.000529522	0.0100609	FALSE
5F9	1D7R1	chr17	20000000	20025000	20200000	20225000	200000	33.9994	11.1328	-1.61069	-3.87692	0.000105786	0.00126943	FALSE
5F9	1D7R1	chr17	19775000	19800000	20100000	20125000	325000	11.9629	30.9558	1.37165	3.10472	0.00190462	0.00761847	FALSE
5F9	1D7R2	chr17	20525000	20550000	20550000	20575000	25000	32.687	13.5195	-1.27368	-3.4023	0.000668212	0.0247239	FALSE
5F9	1D7R2	chr17	20225000	20250000	20550000	20575000	325000	9.50225	20.5955	1.11599	2.66125	0.00778516	0.0311406	FALSE
1D7R1	1D7R2	chr17	20000000	20025000	20200000	20225000	200000	12.6911	32.3897	1.35172	3.21199	0.0013182	0.0210911	FALSE
1D7R1	1D7R2	chr17	19950000	19975000	20250000	20275000	300000	9.74668	26.1117	1.42172	3.384	0.000714392	0.00642952	TRUE
1D7R1	1D7R2	chr17	20000000	20025000	20300000	20325000	300000	13.6454	31.6506	1.21382	2.87314	0.00406411	0.0182885	FALSE
1D7R1	1D7R2	chr17	20100000	20125000	20550000	20575000	450000	20.293	11.9713	-0.7614	-1.98055	0.0476412	0.0476412	FALSE
Comparisons between two lines not containing a provirus within the region tested
1G2	5F9	chr17	19775000	19800000	20075000	20100000	300000	23.9494	6.84686	-1.80648	-3.77978	0.000156968	0.00141272	FALSE
Jurkat	1G2	chr17	19775000	19800000	19975000	20000000	200000	10.2736	20.1514	0.971934	2.79841	0.00513547	0.0256774	FALSE
Jurkat	1G2	chr17	19975000	20000000	20275000	20300000	300000	28.0575	12.8074	-1.13141	-2.55088	0.0107453	0.0107453	FALSE
Jurkat	5F9	chr17	20375000	20400000	20375000	20400000	0	7.73964	25.9808	1.7471	4.88308	1.04439e-06	3.44649e-05	FALSE
